# Supplementary material for: Repair of joint damage in patients with rheumatoid arthritis does not relate to previous suppression of inflammation: a subanalysis after 8 years treat-to-target in the BeSt-trial
Source: HighWire-hosted journal article supplement (doi:10.1136/rmdopen-2023-002995), 2023-04-01
Supplement: rmdopen-2023-002995supp003_data_supplement.pdf [file rmdopen-2023-002995supp003_data_supplement.pdf]

Supplementary table 3. Treatment per patient in the 2 years previous to repair

| Patient | Treatment steps at certain amounts of months prior to occurrence of repair |                  |                  |                  |                  |                  |                  |                  |                  |
|---------|----------------------------------------------------------------------------|------------------|------------------|------------------|------------------|------------------|------------------|------------------|------------------|
|         | Initial group                                                              | 24 months        | 21 months        | 18 months        | 15 months        | 12 months        | 9 months         | 6 months         | 3 months         |
| 1       | 1                                                                          |                  |                  |                  |                  | SSA              | SSA              | SSA              | LEF              |
| 2       | 3                                                                          | MTX+SSA<br>+PRED |
| 3       | 2                                                                          | MTX+IFX          | MTX+IFX          | MTX+IFX          | MTX+IFX          | MTX+IFX          | MTX+IFX          | MTX+CYC<br>+PRED | MTX+CYC<br>+PRED |
| 4       | 3                                                                          | MTX+SSA<br>+PRED |
| 5       | 1                                                                          | LEF              |
| 6       | 4                                                                          |                  |                  |                  |                  | MTX+IFX          | MTX+IFX          | MTX+IFX          | MTX+IFX          |
| 7       | 1                                                                          | LEF              |
| 8       | 1                                                                          | Enbrel           | Enbrel           | None             | None             | None             | None             | None             | None             |
| 9       | 1                                                                          |                  |                  |                  |                  | MTX              | SSA              | SSA              | SSA              |
| 10      | 3                                                                          | MTX+IFX          |
| 11      | 1                                                                          | LEF              | LEF              | MTX+IFX          | MTX+IFX          | MTX+IFX          | MTX+IFX          | MTX+IFX          | MTX+IFX          |
| 12      | 1                                                                          |                  |                  |                  |                  | MTX              | MTX              | MTX              | MTX              |
| 13      | 1                                                                          | MTX+IFX          |
| 14      | 2                                                                          | MTX+IFX          |
| 15      | 3                                                                          | MTX+SSA<br>+PRED |
| 16      | 2                                                                          | MTX+SSA          |
| 17      | 2                                                                          | MTX+SSA<br>+HCQ  |

HCQ: hydroxychloroquine, IFX: infliximab, LEF: leflunomide, MTX: methotrexate, PRED: prednisone, SSA: sulfasalazine
